# Supplementary material
Source: MDPI journal article supplement (https://www.mdpi.com/2227-7102/14/4/426)
Supplement: s1 [file s1 › education-2931673-supplementary.pdf]

Supplement to Relationships and gender differences in math anxiety, math self-efficacy, geoscience self-efficacy, and geoscience interest in introductory geoscience students

All measures were presented in a counterbalanced order, and each scale was preceded by the following instructions:

"Below are questions related to your [variable]. Please indicate to what extent you agree with each of the statements below. Some questions may seem repetitive, that is intentional."

Math Anxiety: Abbreviated Math Anxiety Scale [93]

|                                                                                               | Low anxiety           | Some anxiety          | Moderate anxiety      | Quite a bit of anxiety | High anxiety          |
|-----------------------------------------------------------------------------------------------|-----------------------|-----------------------|-----------------------|------------------------|-----------------------|
| Having to use tables in the back of a math book.                                              | <input type="radio"/> | <input type="radio"/> | <input type="radio"/> | <input type="radio"/>  | <input type="radio"/> |
| Thinking about an upcoming math test one day before.                                          | <input type="radio"/> | <input type="radio"/> | <input type="radio"/> | <input type="radio"/>  | <input type="radio"/> |
| Watching a teacher work an algebraic equation on the board.                                   | <input type="radio"/> | <input type="radio"/> | <input type="radio"/> | <input type="radio"/>  | <input type="radio"/> |
| Taking a math exam.                                                                           | <input type="radio"/> | <input type="radio"/> | <input type="radio"/> | <input type="radio"/>  | <input type="radio"/> |
| Being given a homework assignment of many difficult problems which is due next class meeting. | <input type="radio"/> | <input type="radio"/> | <input type="radio"/> | <input type="radio"/>  | <input type="radio"/> |
|                                                                                               | Low anxiety           | Some anxiety          | Moderate anxiety      | Quite a bit of anxiety | High anxiety          |
| Listening to a lecture in math class.                                                         | <input type="radio"/> | <input type="radio"/> | <input type="radio"/> | <input type="radio"/>  | <input type="radio"/> |
| Listening to another student explain a math formula.                                          | <input type="radio"/> | <input type="radio"/> | <input type="radio"/> | <input type="radio"/>  | <input type="radio"/> |
| Being given a "pop quiz" in math class.                                                       | <input type="radio"/> | <input type="radio"/> | <input type="radio"/> | <input type="radio"/>  | <input type="radio"/> |
| Starting a new chapter in a math textbook.                                                    | <input type="radio"/> | <input type="radio"/> | <input type="radio"/> | <input type="radio"/>  | <input type="radio"/> |

Math Self-Efficacy: Math Self-Efficacy Scale [94]

|                                                    | Not at all<br>confident | A little<br>confident | Confident             | A lot<br>confident    | Very<br>confident     |
|----------------------------------------------------|-------------------------|-----------------------|-----------------------|-----------------------|-----------------------|
| A simultaneous<br>equation                         | <input type="radio"/>   | <input type="radio"/> | <input type="radio"/> | <input type="radio"/> | <input type="radio"/> |
| Work with decimals                                 | <input type="radio"/>   | <input type="radio"/> | <input type="radio"/> | <input type="radio"/> | <input type="radio"/> |
| Determine the<br>degrees of a missing<br>angle     | <input type="radio"/>   | <input type="radio"/> | <input type="radio"/> | <input type="radio"/> | <input type="radio"/> |
| An algebra problem                                 | <input type="radio"/>   | <input type="radio"/> | <input type="radio"/> | <input type="radio"/> | <input type="radio"/> |
| A problem in<br>trigonometry                       | <input type="radio"/>   | <input type="radio"/> | <input type="radio"/> | <input type="radio"/> | <input type="radio"/> |
|                                                    | Not at all<br>confident | A little<br>confident | Confident             | A lot<br>confident    | Very<br>confident     |
| Calculate the values<br>of area and volume         | <input type="radio"/>   | <input type="radio"/> | <input type="radio"/> | <input type="radio"/> | <input type="radio"/> |
| Sketch a curve                                     | <input type="radio"/>   | <input type="radio"/> | <input type="radio"/> | <input type="radio"/> | <input type="radio"/> |
| Work with fractions                                | <input type="radio"/>   | <input type="radio"/> | <input type="radio"/> | <input type="radio"/> | <input type="radio"/> |
| Determine the value<br>of a missing side<br>length | <input type="radio"/>   | <input type="radio"/> | <input type="radio"/> | <input type="radio"/> | <input type="radio"/> |

Geoscience Self-Efficacy: 4 items used by Pugh et al.[69]

|                                                                                                  | Strongly disagree     | Disagree              | Neither agree nor disagree | Agree                 | Strongly agree        |
|--------------------------------------------------------------------------------------------------|-----------------------|-----------------------|----------------------------|-----------------------|-----------------------|
| I'm certain I can figure out how to do the most difficult class work in my geoscience course(s). | <input type="radio"/> | <input type="radio"/> | <input type="radio"/>      | <input type="radio"/> | <input type="radio"/> |
| I can do almost all the work in my geoscience course(s) if I don't give up.                      | <input type="radio"/> | <input type="radio"/> | <input type="radio"/>      | <input type="radio"/> | <input type="radio"/> |
| Even if the work in my geoscience course(s) is hard, I can learn it.                             | <input type="radio"/> | <input type="radio"/> | <input type="radio"/>      | <input type="radio"/> | <input type="radio"/> |
| I can do even the hardest work in my geoscience course(s) if I try.                              | <input type="radio"/> | <input type="radio"/> | <input type="radio"/>      | <input type="radio"/> | <input type="radio"/> |

Geoscience Interest: 9 items used by Pugh et al., [65]

|                                                                           | Strongly disagree     | Disagree              | Neither agree nor disagree | Agree                 | Strongly agree        |
|---------------------------------------------------------------------------|-----------------------|-----------------------|----------------------------|-----------------------|-----------------------|
| Geoscience concepts are valuable because they will help me in the future. | <input type="radio"/> | <input type="radio"/> | <input type="radio"/>      | <input type="radio"/> | <input type="radio"/> |
| Geoscience concepts are practical for me to know.                         | <input type="radio"/> | <input type="radio"/> | <input type="radio"/>      | <input type="radio"/> | <input type="radio"/> |
| Geoscience concepts will be useful for me later in life.                  | <input type="radio"/> | <input type="radio"/> | <input type="radio"/>      | <input type="radio"/> | <input type="radio"/> |
| Geoscience concepts help me in daily life outside of school.              | <input type="radio"/> | <input type="radio"/> | <input type="radio"/>      | <input type="radio"/> | <input type="radio"/> |
| I enjoy the geosciences.                                                  | <input type="radio"/> | <input type="radio"/> | <input type="radio"/>      | <input type="radio"/> | <input type="radio"/> |
|                                                                           | Strongly disagree     | Disagree              | Neither agree nor disagree | Agree                 | Strongly agree        |
| I am fascinated by the geosciences.                                       | <input type="radio"/> | <input type="radio"/> | <input type="radio"/>      | <input type="radio"/> | <input type="radio"/> |
| I like the geosciences.                                                   | <input type="radio"/> | <input type="radio"/> | <input type="radio"/>      | <input type="radio"/> | <input type="radio"/> |
| I enjoy doing geoscience activities.                                      | <input type="radio"/> | <input type="radio"/> | <input type="radio"/>      | <input type="radio"/> | <input type="radio"/> |
| The geosciences are exciting to me.                                       | <input type="radio"/> | <input type="radio"/> | <input type="radio"/>      | <input type="radio"/> | <input type="radio"/> |
